# Supplementary material for: Photopolymerizable Ionogel with Healable Properties Based on Dioxaborolane Vitrimer Chemistry
Source: MDPI journal article supplement (doi:10.3390/gels8060381), 2022-06-15
Supplement: s1 [file s1]

# Photopolymerizable Ionogel with Healable Properties Based on Dioxaborolane Vitrimer Chemistry

Fengdi Li, Giao T. M. Nguyen, Cédric Vancaeyzeele, Frédéric Vidal and Cédric Plesse \*

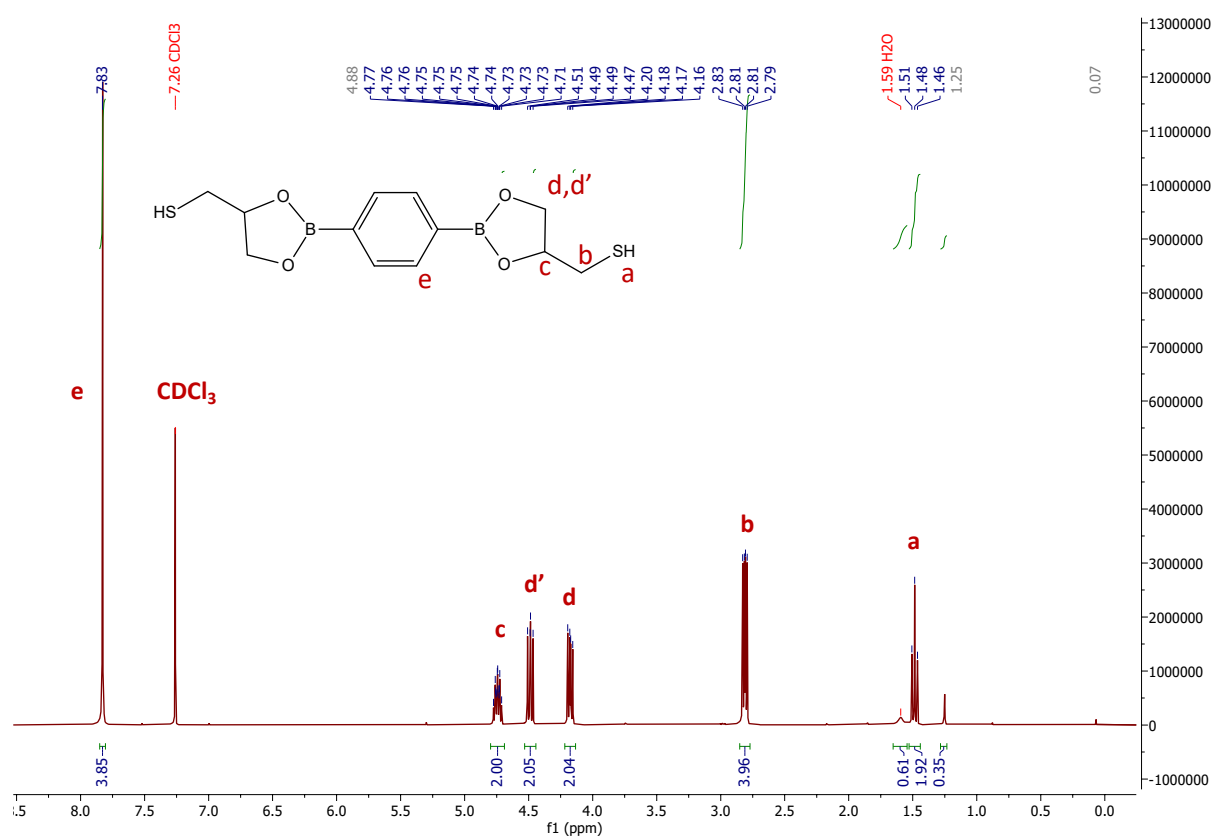

**Figure S1.**  $^1\text{H}$  NMR of 2,2'-(1,4-Phenylene)-bis[4-mercaptan-1,3,2-dioxaborolane] (BDB) in  $\text{CDCl}_3$ .

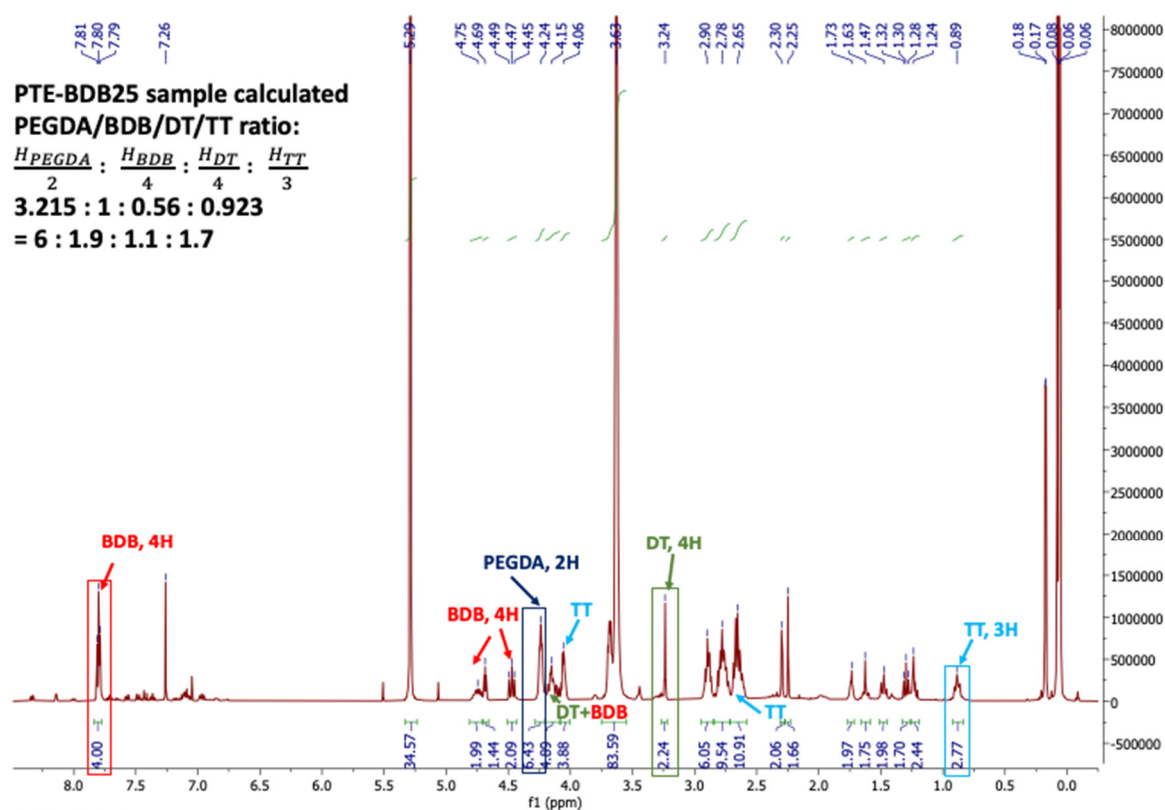Figure S2.  $^1\text{H}$  NMR of the extractable content of PTE-BDB25 sample in  $\text{CDCl}_3$ .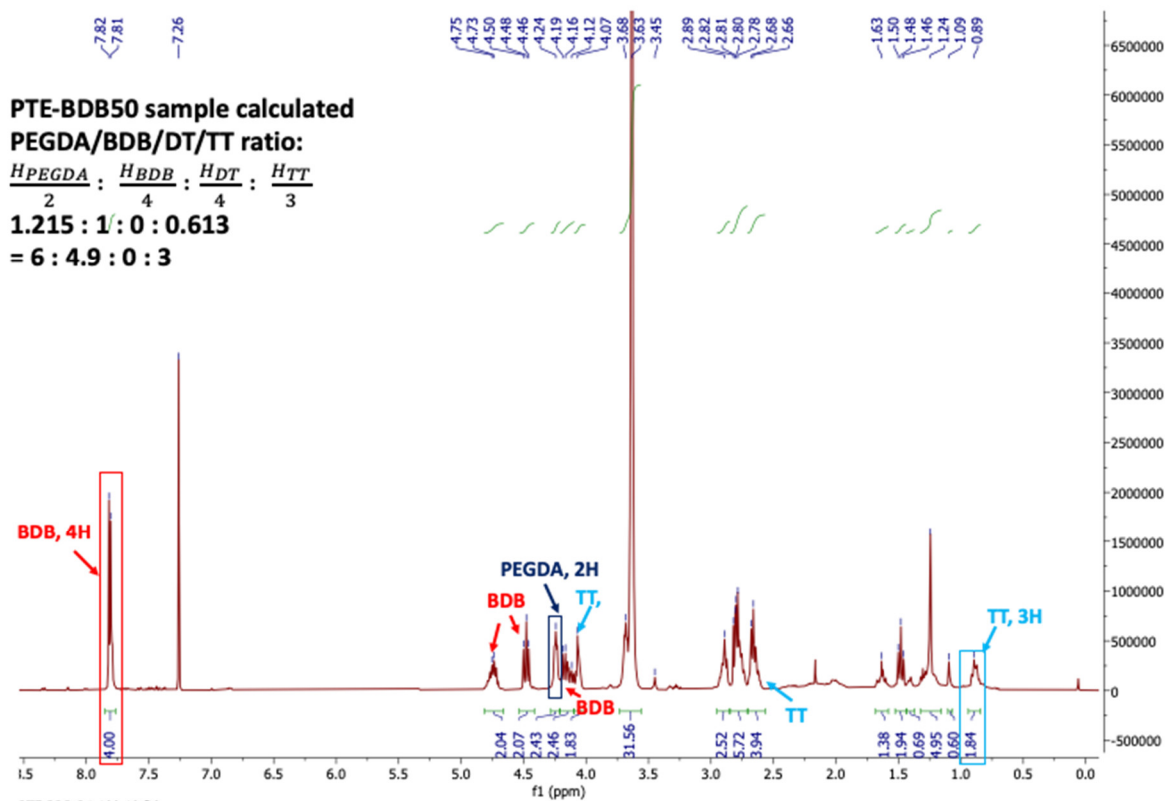Figure S3.  $^1\text{H}$  NMR of the extractable content of PTE-BDB50 sample in  $\text{CDCl}_3$ .

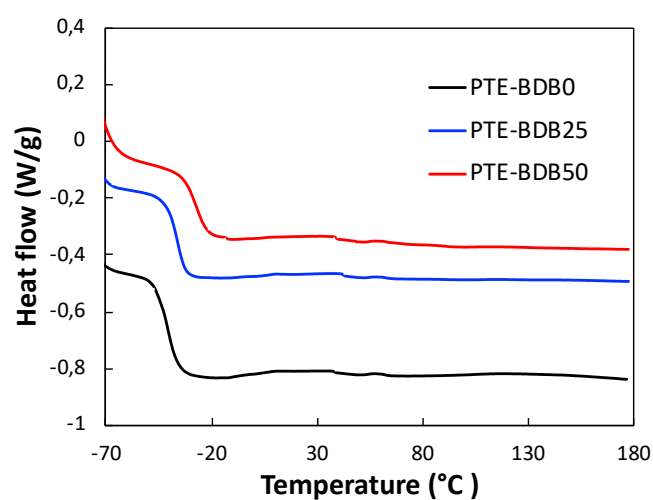

Figure S4. DSC curves of thermal cured PTE-BDB series samples.

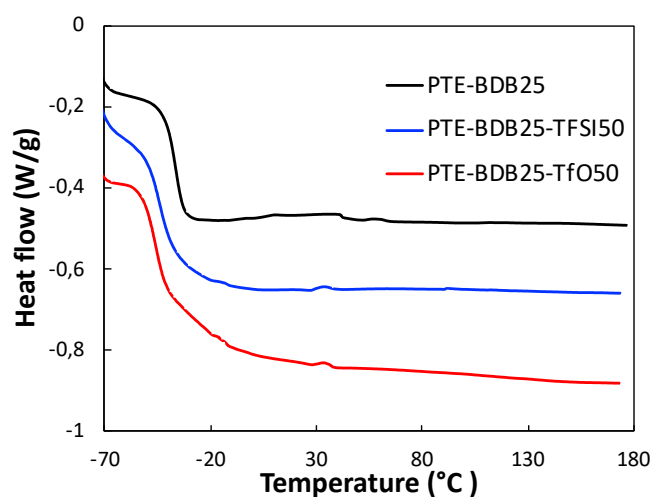

Figure S5. DSC curves of thermal cured PTE-BDB-IL dynamic ionogels and PTE-BDB25 sample.

**Table S1.** Relaxation times extracted from stress relaxation tests of PTE-BDB samples and their corresponding theoretical  $T_v$  and  $E_a$  associated with the boronic ester exchange reaction.

| Sample    | Relaxation time (min) |       |        |        |        |        | $T_v$ (°C) | $E_a$ (kJ·mol <sup>-1</sup> ) |
|-----------|-----------------------|-------|--------|--------|--------|--------|------------|-------------------------------|
|           | 60 °C                 | 80 °C | 100 °C | 120 °C | 130 °C | 140 °C |            |                               |
| PTE-BDB25 | 160                   | 53.9  | 3.5    | 3.1    | 1.4    | 1.1    | 11.7       | 75.6                          |
| PTE-BDB50 | /                     | 10.0  | 1.3    | 1.4    | /      | 0.6    | -31.0      | 49.9                          |

**Table S2.** Relaxation times extracted from stress relaxation tests of PTE-BDB-IL samples and their corresponding theoretical  $T_v$  and  $E_a$  associated with the boronic ester exchange reaction.

| Sample           | Relaxation time (min) |       |        |        |        |  | $T_v$ (°C) | $E_a$ (kJ·mol <sup>-1</sup> ) |
|------------------|-----------------------|-------|--------|--------|--------|--|------------|-------------------------------|
|                  | 60 °C                 | 80 °C | 100 °C | 120 °C | 140 °C |  |            |                               |
| PTE-BDB25        | 160                   | 53.9  | 3.5    | 3.1    | 1.1    |  | 11.7       | 75.6                          |
| PTE-BDB25-TFSI50 | 214                   | 9.4   | 2.6    | 1.7    | 0.6    |  | 0.3        | 78.7                          |
| PTE-BDB25-TfO50  | 211                   | 58.1  | 8.9    | 4.1    | 1.6    |  | 2.0        | 72.0                          |
